# Supplementary material
Source: MDPI journal article supplement (https://www.mdpi.com/2313-433X/10/4/80)
Supplement: s1 [file s1]

Supplementary Material

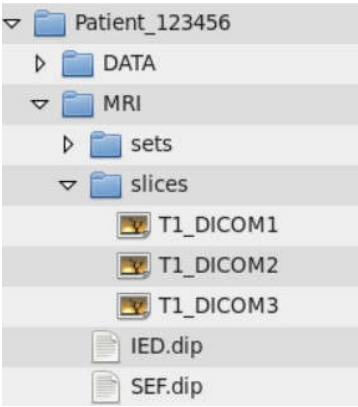

**Supplementary Figure 1.** The screenshot illustrates the file structure within our MEG system. Specifically, the dipole files are in the .dip format within the MRI folder, and the subfolder titled "slices" houses the DICOM files utilized by MAV. IED, Interictal Epileptiform Discharge; SEF, Somatosensory Evoked Field.

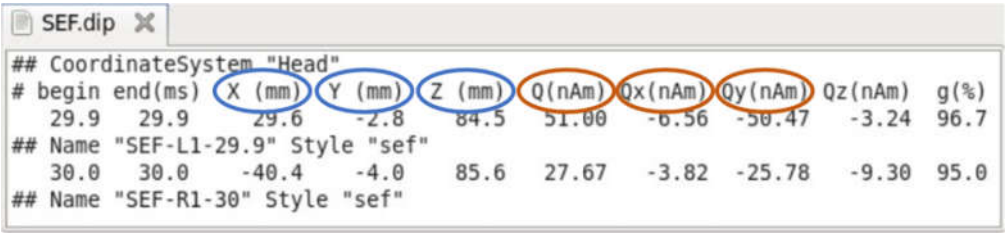

**Supplementary Figure 2.** Screenshot of a .dip file generated by our MEG software, with the dipole's x, y, and z coordinates circled in blue and the dipole's moments circled in orange, which are the values MAV uses to match with the MRI. SEF, somatosensory evoked field; L, left; R right; mm, millimeters; Q, charge; nAm, Nano amperes; g, g-value.

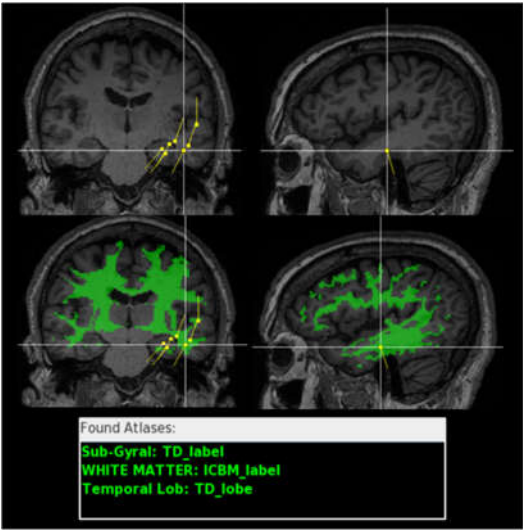

**Supplementary Figure 3.** MPRAGE T1-weighted MRI with the crosshair centered on a dipole localized within the white matter (WM). The MRI was segmented using the FLIRT method. The scan is shown in coronal (left) and sagittal (right) views. The top of the image shows only the dipoles, while the bottom shows the ICBM label WM atlas parcellation overlays the dipole. The AAL atlas was unable to label the dipole correctly due to its location in the WM, but the ICBM label was able to correctly identify it as WM since it includes WM parcellation; TD, Talairach Atlas; ICBM, International Consortium for Brain Mapping. Temporal Lob, temporal lobe.

**Supplementary Table 1.** List of all available atlases in MAV and their labeling systems. The MAV application uses the SPM MNI template to normalize the MRI and reverse-normalize it with available atlases, adapted from the Pickatlas application.

| Atlas                                             | Labeling System                                             |
|---------------------------------------------------|-------------------------------------------------------------|
| AAL MNI v4/ AAL116                                | 116 GM anatomical parcellations                             |
| Anterior Salience                                 | 7 anatomical-functional WM parcellations                    |
| Atlas116                                          | 116 GM anatomical parcellations                             |
| Atlas71                                           | 71 GM anatomical parcellations                              |
| Auditory                                          | 3 anatomical-functional WM parcellations                    |
| Basal Ganglia                                     | 5 anatomical-functional WM parcellations                    |
| CBF (Cerebral Blood Flow)                         | 7 major cerebral arterial territories parcellations         |
| Dorsal DMN (default mode network)                 | 9 anatomical-functional WM parcellations                    |
| High Visual                                       | 2 anatomical-functional WM parcellations                    |
| ICBM (International Consortium for Brain Mapping) | 56 GM + WM anatomical parcellations                         |
| ICBM WMPM (White Matter Parcellation Map)         | 50 WM anatomical parcellations                              |
| Language                                          | 7 anatomical-functional WM parcellations                    |
| LECN (left Executive Control Network)             | 6 anatomical-functional WM parcellations                    |
| Posterior Salience                                | 12 anatomical-functional WM parcellations                   |
| Precuneus                                         | 4 anatomical-functional WM parcellations                    |
| Primary Visual                                    | 2 anatomical-functional WM parcellations                    |
| rECN (right Executive Control Network)            | 6 anatomical-functional WM parcellations                    |
| Sensorimotor                                      | 6 anatomical-functional WM parcellations                    |
| TD (Talairach Daemon) Brodmann                    | 47 Brodmann areas + 28 subcortical anatomical parcellations |
| TD (Talairach Daemon) label                       | 55 GM + Ventricle anatomical parcellations                  |
| Talairach Daemon (TD) lobe                        | 12 anatomical structures: lobes + subcortical structures    |
| Visuospatial                                      | 11 anatomical-functional WM parcellations                   |

GM, gray matter; WM, white matter.
